# Supplementary material
Source: publisher site journal article supplement (https://www.dovepress.com/article/288111)
Supplement: Supplementary file 1 [file get_supplementary_file.php]

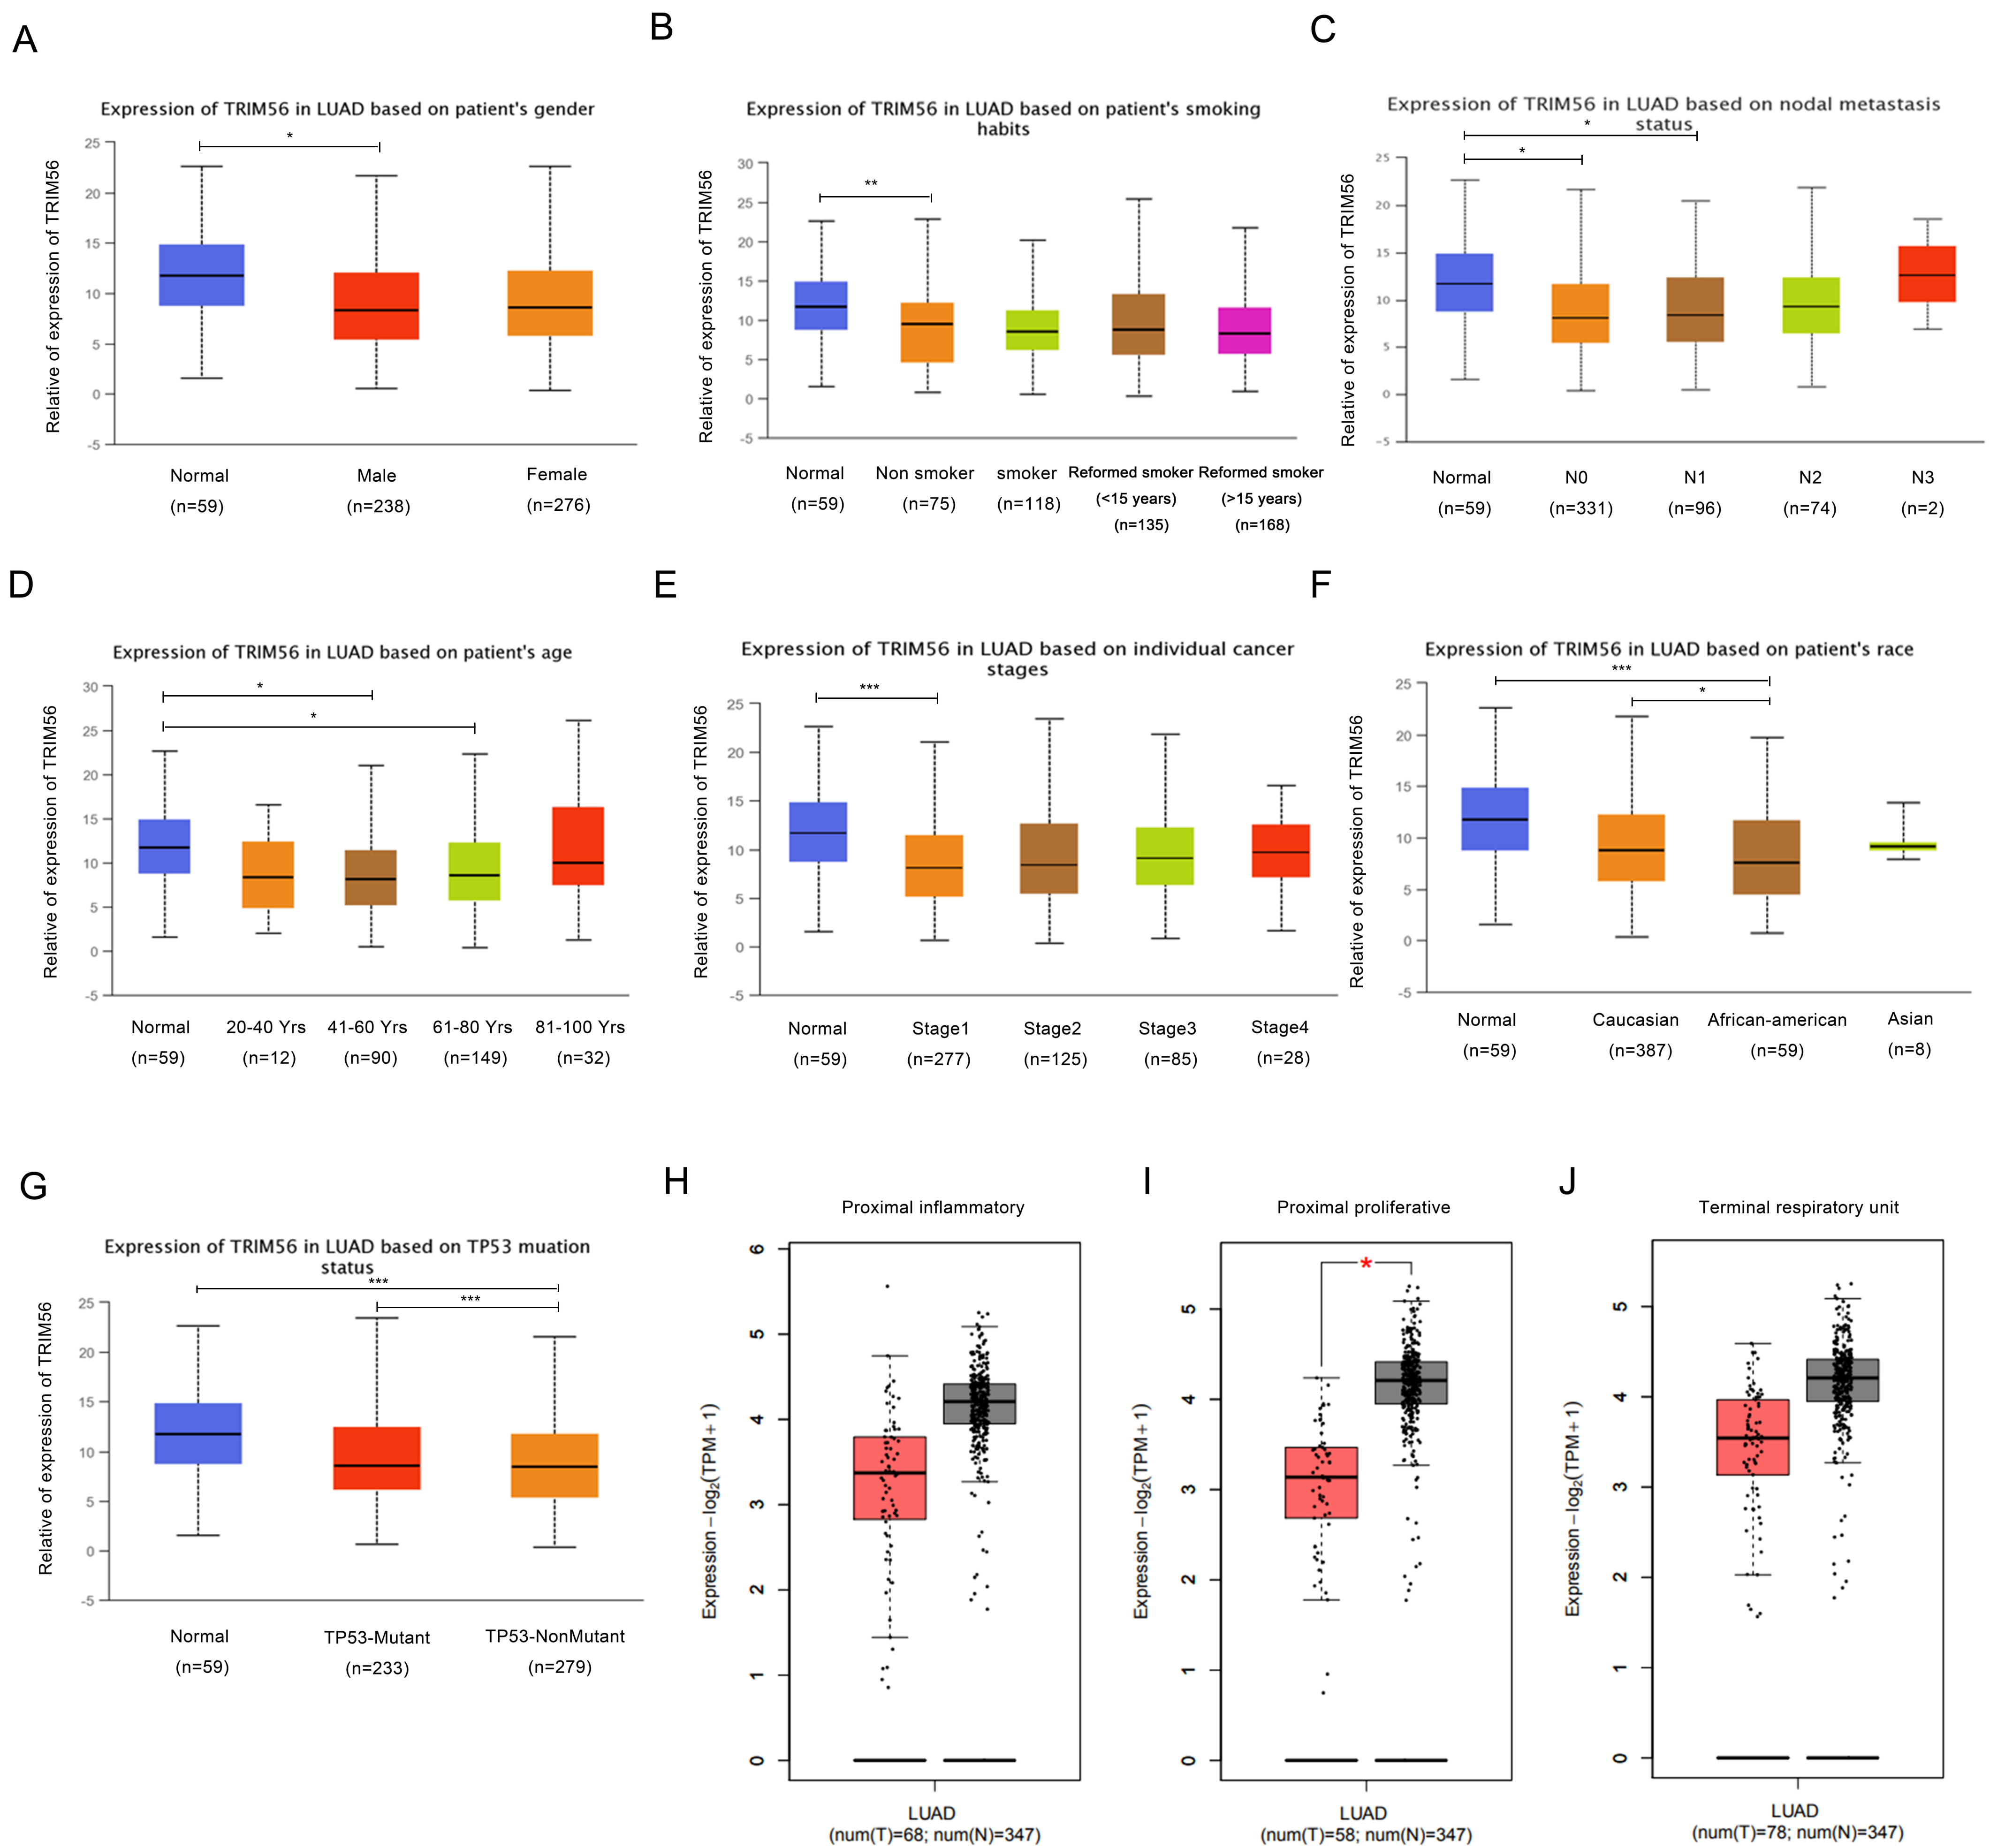

Supplementary Figure .1 Association between TRIM56 expression and clinicopathologic characteristics of patients with lung adenocarcinoma obtained from TCGA-LUAD cohort. (A-G) Boxplot showing clinicopathologic characteristics from normal and LUAD patients via UALCAN (A) Gender. (B) Smoking habits (Non smoker, smoker, reformed smoker <15 years and reformed smoker >15 years). (C-D) Race (Normal, Caucasian, African-American or Asian) and Age (aged 21-40, 41-60, 61-80, or 81-100 years). (E) Tumor stage (stage1, stage2, stage3 or stage4). (F) Nodal metastasis status (N0, N1, N2 or N3). (G) TP53 mutation (TP53-Mutation or TP53-NoMutation). \*P<0.05, \*\*P < 0.01, \*\*\*P<0.001. (H-J) Boxplot showing the relative expression of TRIM56 based on three subtypes of lung adenocarcinoma from normal and tumor via GEPIA database. (H) Terminal Respiratory Unit (TRU). (I) Proximal proliferative (PP) (J) Proximal Inflammatory (PI). \*P<0.05.
